# Supplementary material
Source: PubMed Central journal article supplement (PMC4431576)
Supplement: NIHMS688576-supplement-supplemental_data.pdf [file NIHMS688576-supplement-supplemental_data.pdf]

## Supplemental figure 1

Represent tracing of vasoactivity in response to r-irisin in vessel rings pretreated with KCL

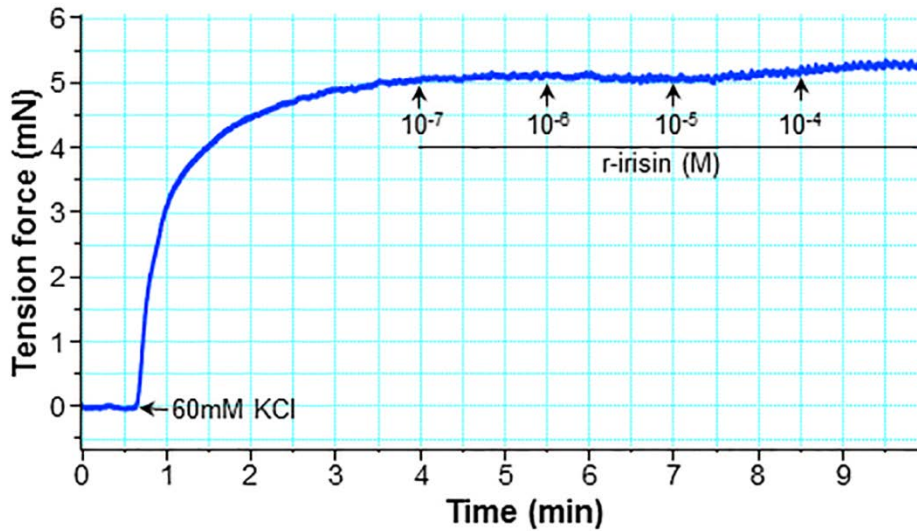

The 2nd order of mesenteric artery rings dissected from SD rats were mounted onto wire myograph as indicated in the method section. The vasoactivity of rings was measured. The rings were pre-treated with 60mM potassium chloride (KCl). When the ring contraction reached to plateau level, the relaxation response to series concentration of r-irisin were assayed.
